# Supplementary material for: Development and utility of a new 3-D magnetron source for high rate deposition of highly conductive ITO thin films near room temperature
Source: Royal Society of Chemistry journal article supplement (doi:10.1039/c7cp07318f), 2018-01-01

## High rate deposition of highly conductive ITO thin films by a new 3-D magnetron source near room temperature

Long Wen, Bibhuti Bhusan Sahu\* and Jeon Geon Han

### Supplementary information

#### Some difficulties/disadvantages of magnetron sputtering

➤ At high plasma density and high deposition rate

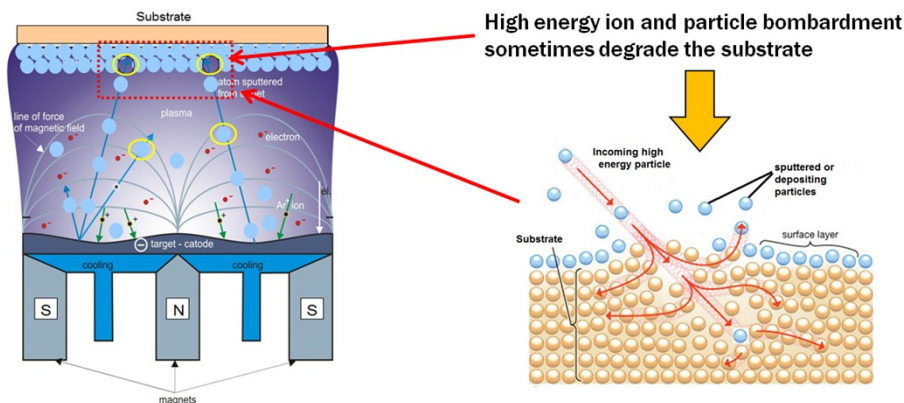

- Materials or thin films are degraded by high energy atom and ion bombardments  
→ **Lead increase substrate temperature and damage**
- Complexity of plasma based process and process control is not straightforward
- It is also challenging for the crystallization of the film at low-temperature < 100°C**

#### Our key demands /requirements

Our demand on process and material

##### Process requirement

- High rate deposition
- High target efficiency and large area deposition
- Low-temperature deposition process
- Cost-effective fabrication

##### Material aspect

- Good crystallinity
- High conductivity in ultra thin film
- Film adhesion and flexibility
- High transmittance

Necessity

- New-type and high density plasma source
- Control of plasma parameters (electron temperature, plasma density, etc.)
- Energy control of sputtered particles and ions
- Process understanding, optimization, and control by diagnostics
- To reduce/clean amorphization or to enhance crystallinity by reducing ion flux on the substrate (need good charge trapping).
- **To find the way to sputter a bunch of atoms or to form clusters to add up crystallinity at low-temperature.**

- There is the need of advance plasma process with new-type of sources.
- There is the need of integrated study of film properties and plasma chemistry

## Deposition of ITO films using 3DMS

### Low-temperature Deposition

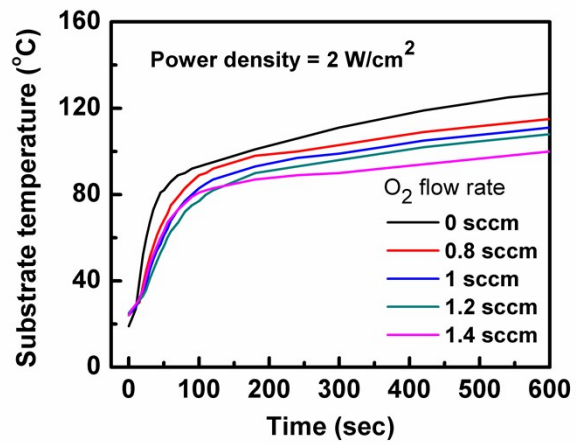

200 nm Film deposition time ≤ 114 Sec

Photo: Magnetron sputtering of ITO films

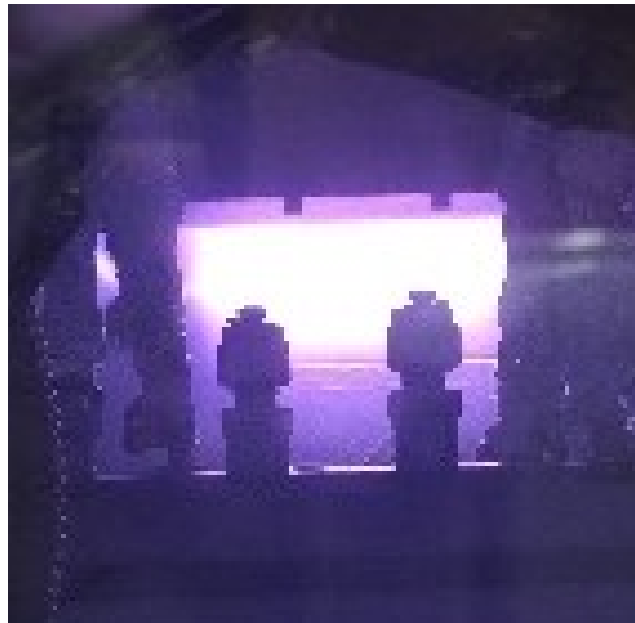

Supplement: c7cp07318f1.pdf [file c7cp07318f1.pdf]
